# Supplementary material for: The influence of applied magnetic fields on the optical properties of zero- and one-dimensional CdSe nanocrystals
Source: Royal Society of Chemistry journal article supplement (doi:10.1039/c3nr03252c), 2013-01-01
Supplement: c3nr03252c.pdf [file c3nr03252c.pdf]

**Supporting information for**  
**The Influence of Applied Magnetic Fields on the Optical Properties of Zero- and One-Dimensional CdSe Nanocrystals**

Daniel E. Blumling,<sup>a</sup> Stephen McGill<sup>b</sup> and Kenneth L. Knappenberger, Jr.<sup>a\*</sup>

<sup>a</sup>Departments of Chemistry and Biochemistry, Florida State University,  
Tallahassee, FL 32306

<sup>b</sup>National High Magnetic Field Laboratory, Tallahassee, FL 32310

[klk@chem.fsu.edu](mailto:klk@chem.fsu.edu)

### Size-dependent Magneto-Photoluminescence: Intensity Integrated.

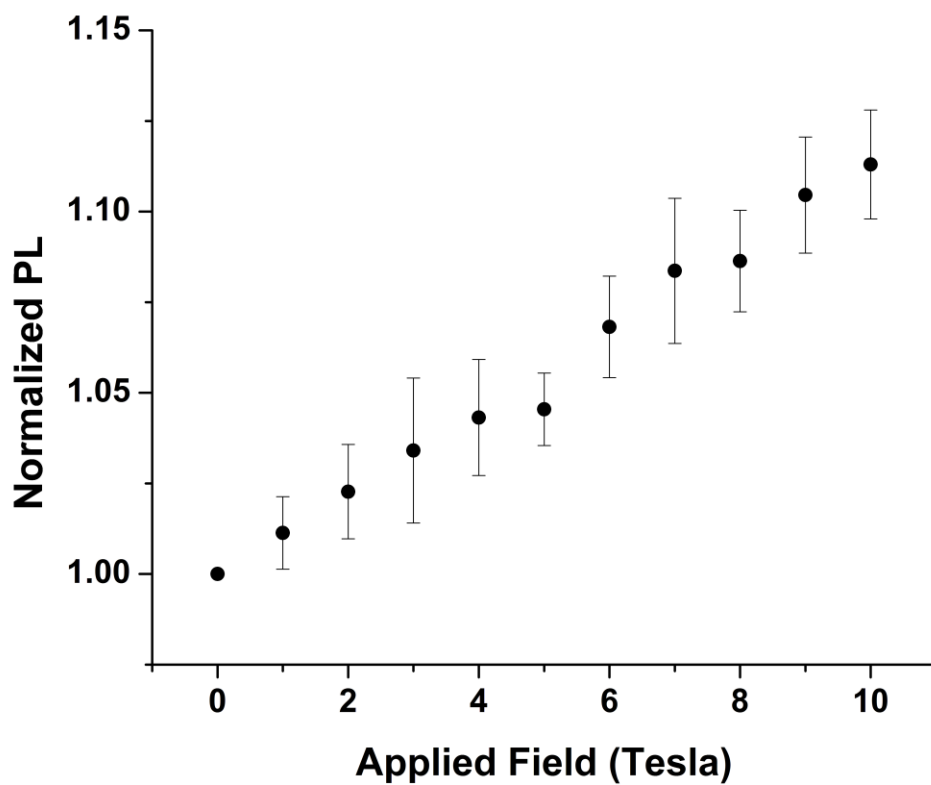

**Figure S1.** Normalized MPL obtained from 3.5-nm 0-D quantum dots excited using 400-nm light. The sample temperature was 4.2 K

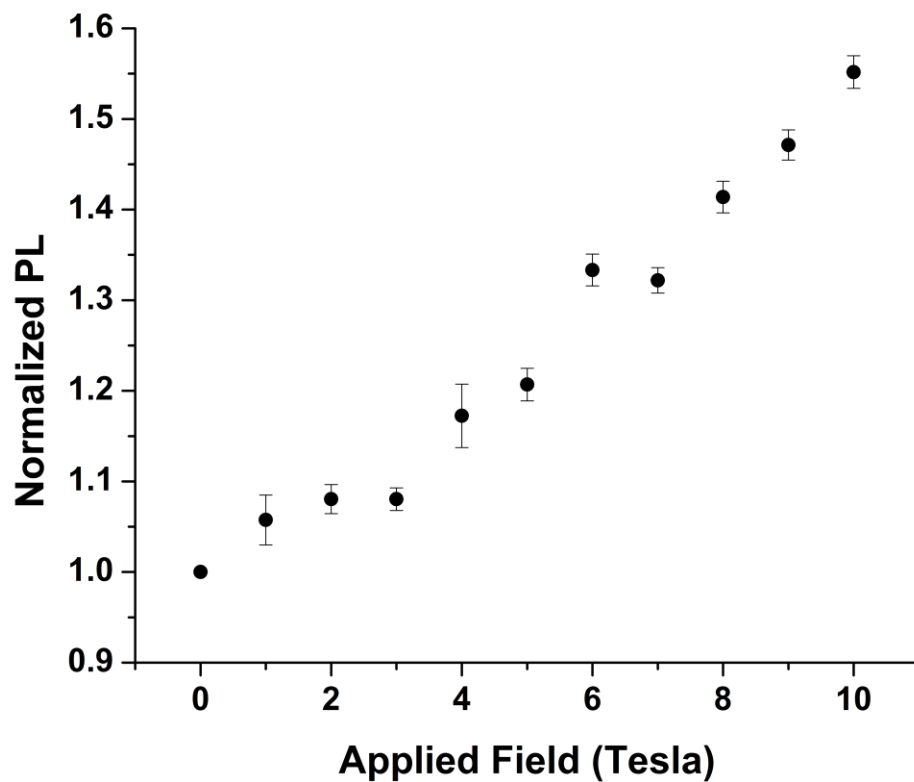

**Figure S2.** Normalized MPL obtained from 6 nm x 20 nm 1-D quantum nanorod excited using 400-nm light. The sample temperature was 4.2 K

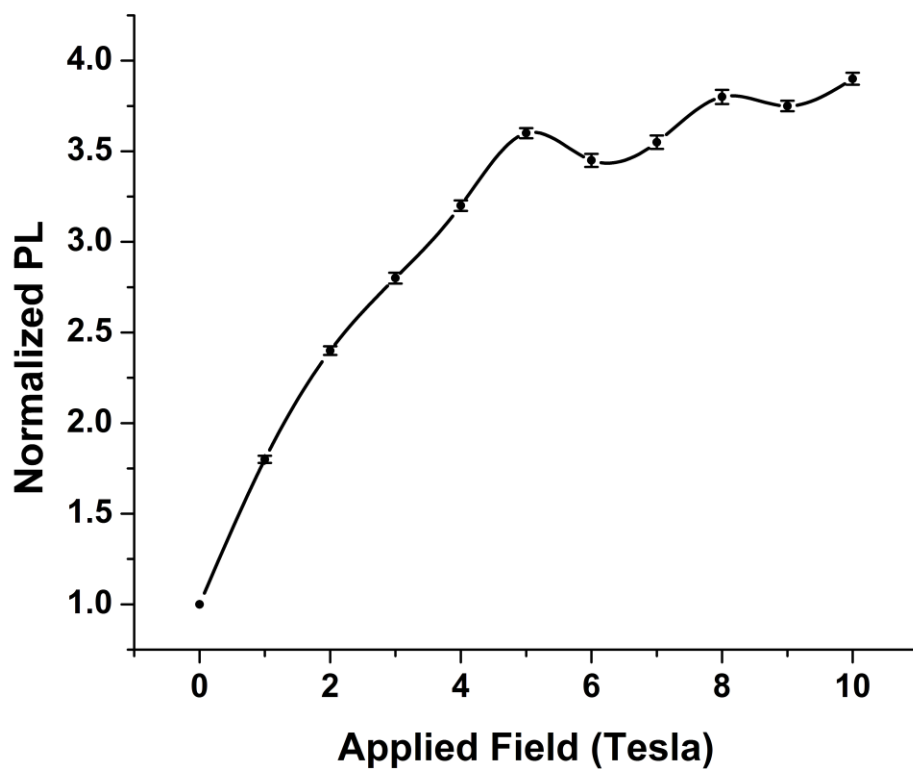

**Figure S3.** Normalized MPL obtained from 6 nm x 35 nm quantum nanorod excited using 400-nm light. The sample temperature was 4.2 K. Average values and standard deviations are determined by carrying out experiments in triplicate. Note: small amplitude modulations and plateau at large applied magnetic field strengths.
